# Supplementary material
Source: MDPI journal article supplement (https://www.mdpi.com/2073-4441/16/1/1)
Supplement: s1 [file s1]

## Supporting Information

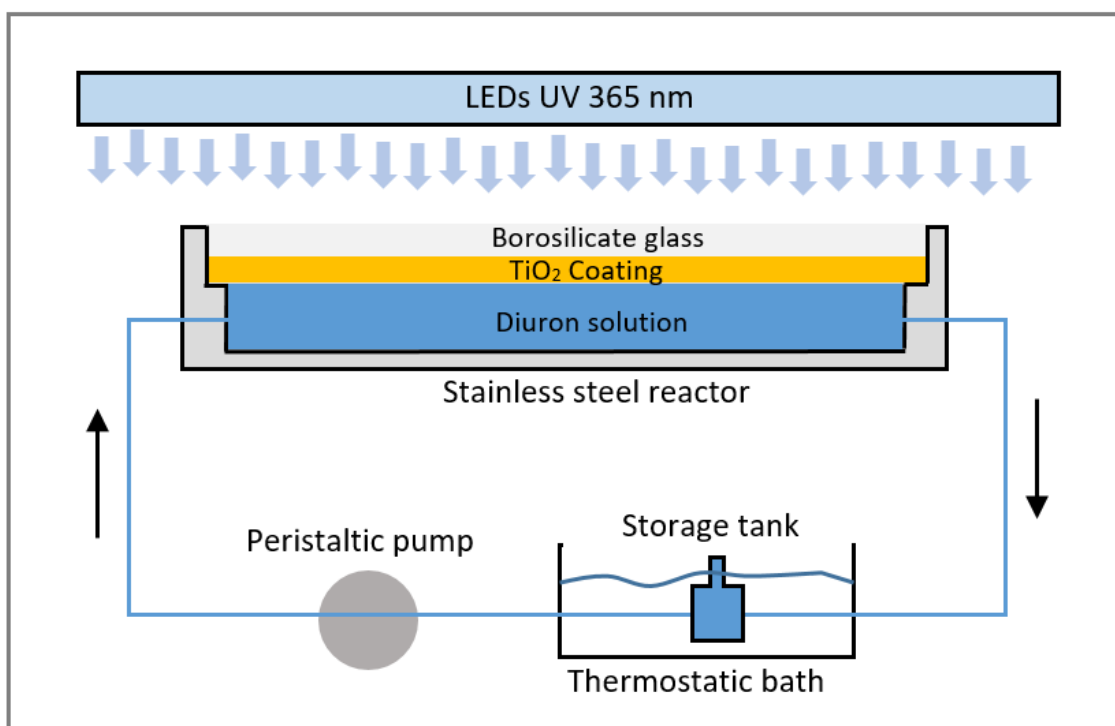

**Figure S1.** Schematic of the experimental setup.

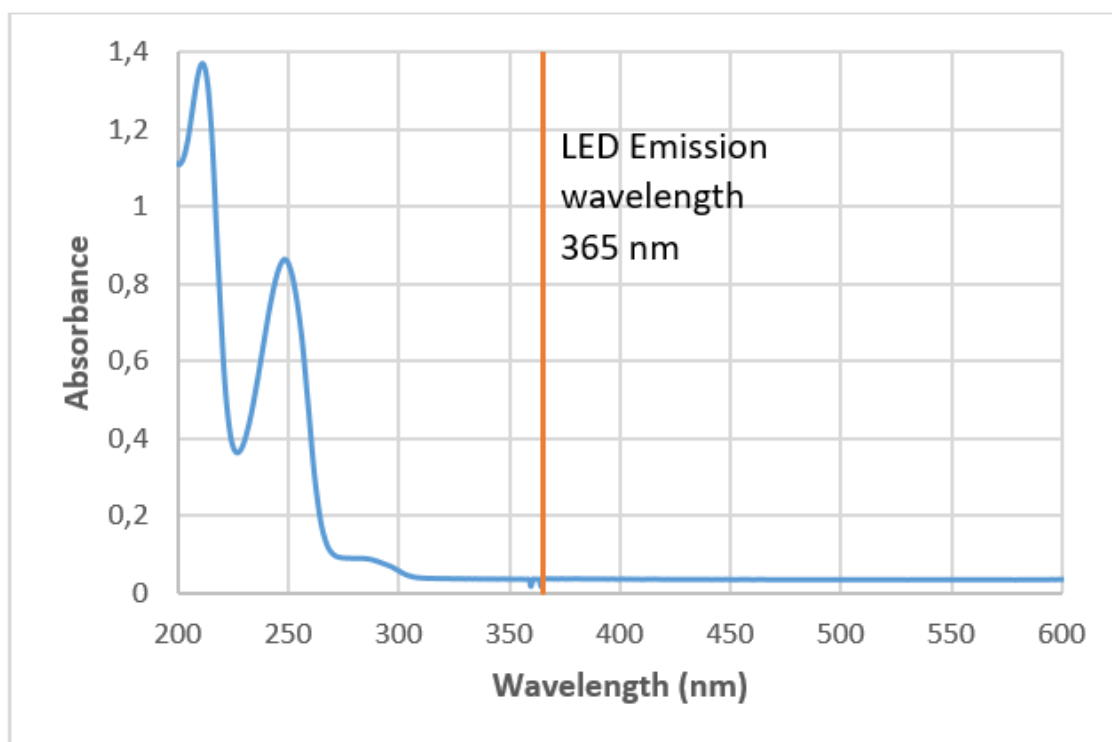

**Figure S2.** Absorbance spectrum of Diuron.

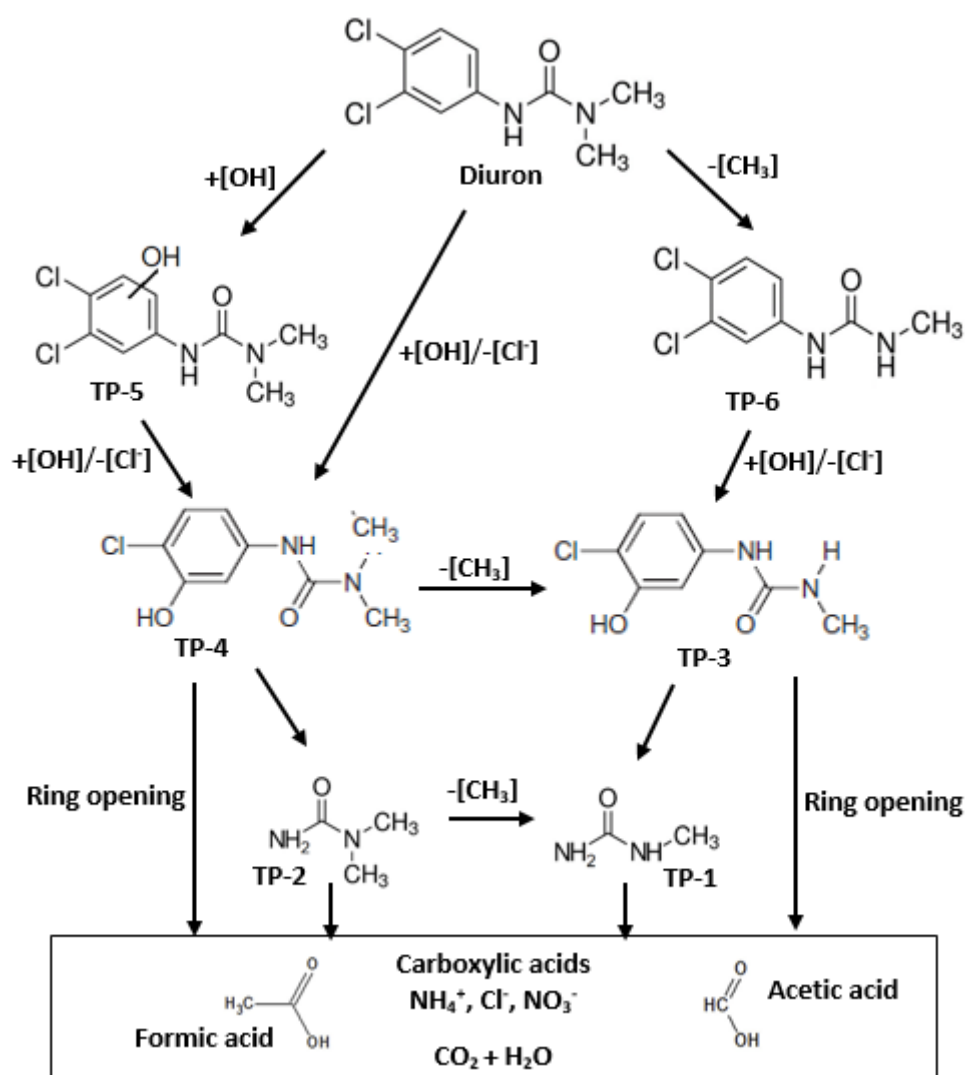

**Figure S3.** Proposed reaction pathways for the photocatalytic degradation of Diuron by C-12 coating: Hydroxylation (+[OH]), demethylation (-[CH<sub>3</sub>]) and dehalogenation (-[Cl<sup>-</sup>]). Adapted from [53,54,71].

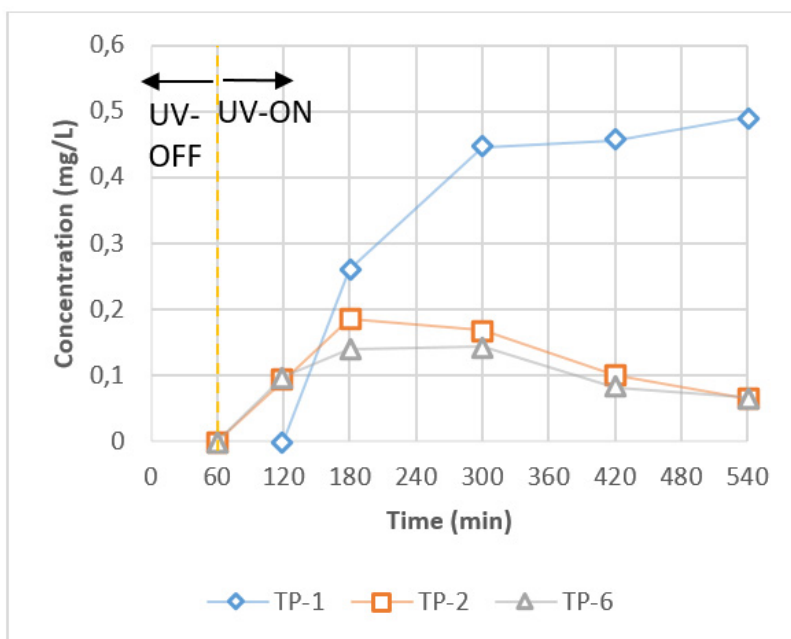

**Figure S4.** Kinetics of the formation and elimination of TP-1, TP-2 and TP-6 during Diuron degradation.

**Table S1.** Physico-chemical properties of Diuron [47].

| Name                                                 | Chemical structure | Molecular formula                                               | Molar Weight (g.mol <sup>-1</sup> ) | pKa | Log Kow | Solubility (mg L <sup>-1</sup> ) |
|------------------------------------------------------|--------------------|-----------------------------------------------------------------|-------------------------------------|-----|---------|----------------------------------|
| Diuron<br>(3-(3,4-dichlorophenyl)-1,1-dimethyl urea) |                    | C <sub>9</sub> H <sub>10</sub> Cl <sub>2</sub> N <sub>2</sub> O | 233.09                              | 3.7 | 2.6     | 42 (water, 20°C)                 |

**Table S2.** Kinetic constants obtained for the Langmuir–Hinshelwood (L-H) model.

| Model | Parameter                                           | C-3    | C-27   | C-7    | C-10   | C-12   | P25    |
|-------|-----------------------------------------------------|--------|--------|--------|--------|--------|--------|
| L-H   | k<br>(mg L <sup>-1</sup> min <sup>-1</sup> )        | 0.0898 | 0.1279 | 0.2727 | 0.3184 | 0.2355 | 1.5883 |
|       | K <sub>ad</sub> (L mg <sup>-1</sup> )               | 0.0089 | 0.0086 | 0.0121 | 0.0157 | 0.0276 | 0.0685 |
|       | K <sub>app</sub> (min <sup>-1</sup> )               | 0.0008 | 0.0011 | 0.0033 | 0.0050 | 0.0065 | 0.1088 |
|       | Σ(C <sub>mod</sub> -C <sub>exp</sub> ) <sup>2</sup> | 0.0455 | 0.0337 | 0.0141 | 0.0274 | 0.0166 | 0.0005 |
